# Supplementary material
Source: PubMed Central journal article supplement (PMC3484427)
Supplement: JCI42127sd.pdf [file JCI42127sd.pdf]

## Supplemental Data

### Supplemental Figures Legends

#### Suppl. Figure 1. PPAR expression in the embryonic and adult pancreas and co-localization with insulin.

(A) Relative *Ppara* mRNA expression levels in the pancreas at different stages of fetal and postnatal life ( $n = 4$ );  $***p < 0.007$ . (B) *Pparg* mRNA levels in the same conditions than (A) ( $n = 4$ );  $*p < 0.05$ ,  $**p < 0.01$ . (C) Relative *Pparb/d* mRNA expression levels in total pancreas and isolated islets ( $n = 5$ );  $*p < 0.05$ . (D) TaqMan analysis of RNA expression of *Pparb/d* in pancreas from *Pparb/d<sup>fl/fl</sup>* (control, C) and *Pdx1Cre;Pparb/d<sup>fl/fl</sup>* (KO) 8-week-old mice ( $n = 3$ );  $***p = 10^{-15}$ . (E) Expression of PPAR $\beta/\delta$  (red) and insulin (green) by immunostaining in pancreas from E17.5 embryos. DAPI in blue. Scale bar: 50  $\mu\text{m}$ . (F) TaqMan analysis of RNA expression of *Ppara* in islets and pancreas from *Pparb/d<sup>fl/fl</sup>* (control, C) and *Pdx1Cre;Pparb/d<sup>fl/fl</sup>* (KO) 8-week-old mice ( $n = 3$ ); NS = not significant. (G) *Pparg* mRNA levels in the same conditions than (F) ( $n = 3$ ).

#### Suppl. Figure 2. Insulin- and Neurog3-expressing cell populations and Neurog3 protein amount in embryonic pancreata; glucagon levels and $\alpha$ - and $\beta$ -cell mass in adult pancreata.

(A) Quantification of insulin expressing cells in embryonic day 15.5 pancreas; insulin-stained cells were normalized with e-cadherin expressing cells (area) ( $n = 3$ ). (B) RNA expression level of *Insulin I* in E15.5 pancreas, measured by qRT-PCR ( $n = 8$ ). (C) Quantification of Neurog3 expressing cells in the same conditions as (A) ( $n = 3$ ). (D) RNA expression level of *Neurog3* in the same conditions as (B) ( $n = 3$ ). (E) Left panel: Neurog3 protein level in

pancreas from *Pparb/d<sup>fl/fl</sup>* (control, C) and *Pdx1Cre;Pparb/d<sup>fl/fl</sup>* (KO) mice at two embryonic stages (E17.5 and E18.5). Right panel: quantification of the blot of left panel. **(F)** Quantification of  $\alpha$ -cell mass from 8-week-old *Pparb/d<sup>fl/fl</sup>* (control, C) and *Pdx1Cre;Pparb/d<sup>fl/fl</sup>* (KO) mice ( $n = 3$ );  $*p < 0.05$ . **(G)** Glucagon content in pancreas from *Pparb/d<sup>fl/fl</sup>* (control, C) and *Pdx1Cre;Pparb/d<sup>fl/fl</sup>* (KO) 8-week-old mice ( $n = 6$ ); NS = not significant. **(H)** Glucagon content in islets from *Pparb/d<sup>fl/fl</sup>* (control, C) and *Pdx1Cre;Pparb/d<sup>fl/fl</sup>* (KO) 8-week-old mice ( $n = 4$ ); NS = not significant. **(I)** Representative *Pparb/d<sup>fl/fl</sup>* (control, C) and *Pdx1Cre;Pparb/d<sup>fl/fl</sup>* (KO) pancreas sections stained with anti-insulin antibody. Scale bar: 1 mm.

**Suppl. Figure 3. Intracellular  $Ca^{2+}$  measurement and GSIS from PPAR $\beta/\delta$  deficient islets.**

**(A)** Free intracellular  $Ca^{2+}$  measurement from dissociated *Pparb/d<sup>fl/fl</sup>* (control, C) and *Pdx1Cre;Pparb/d<sup>fl/fl</sup>* (KO) islets in glucose- (3 vs. 17 mM) and KCl- (3.6 vs. 50 mM) stimulated conditions. Graph of AUC **(B)** and height **(C)** of response to stimulation ( $n = 18$  cells from 3 mice). AU, arbitrary units. **(D)** Left graph: Relative *Pparb/d* mRNA expression in Ad-shRNA-Control and Ad-shRNA-PPAR $\beta/\delta$  adenovirus infected CBL57/6J islets used in GSIS mentioned on the right graph ( $n = 4$ );  $**p < 0.05$ . Right graph: GSIS in adenovirus-infected islets isolated from CBL57/6J mice. The islets were infected either with adenovirus control containing scrambled shRNA (control) or adenovirus containing shRNA against *Pparb/d* the GSIS was performed 72 after the infection as mentioned in the experimental procedures ( $n = 4$ );  $***p < 0.005$ . **(E)** Left graph: Relative *Pparb/d* mRNA expression in adenovirus infected islets used in GSIS shown in the right graph ( $n = 3$ );  $**p < 0.05$ . Right graph: 16.7 mM glucose-stimulated insulin secretion in adenovirus-infected islets from *Pdx1Cre;Pparb/d<sup>fl/fl</sup>* (KO) mice. The islets were infected either with adenovirus containing

human PPAR $\beta/\delta$  coding sequences under CMV promoter (ad-CMV-PPAR $\beta/\delta$ ) or adenovirus containing CMV-GFP construction (ad-control), GSIS was performed as in (D) ( $n = 3$ );  $**p < 0.05$ .

**Suppl. Figure 4. F- and G-actin in *Pparb/d<sup>fl/fl</sup>* (Control) and *Pdx1Cre;Pparb/d<sup>fl/fl</sup>* (KO) isolated islets.**

Matrix-plated islets were stained against F-actin with phalloidin rhodamine (Invitrogen) and G-actin by using DNase I Fluor 488 (Invitrogen). The nuclei were stained with DNase I, indicating the presence of G-actin, as reported previously (1). Scale bar: 50  $\mu\text{m}$ .

**Suppl. Figure 5. Effect of PKD1 inhibitor on the organization of Golgi apparatus in PPAR $\beta/\delta$  deficient islets.**

**(A)** Immunostaining of the *trans* Golgi marker TGN 38 (green) in islets from *Pparb/d<sup>fl/fl</sup>* (control, C) and *Pdx1Cre;Pparb/d<sup>fl/fl</sup>* (KO) mice. **(B)** Effect of PKD1 inhibitor, Gö6976 (Go), on Golgi apparatus in islets from control and KO mice. The immunostaining of giantin (red) labels the Golgi apparatus. DAPI (blue). Scale bar: 20 $\mu\text{m}$ . **(C)** Quantification of giantin stained areas in islets treated with Go during 12h (Go) and untreated (NT) ( $n = 10-15$  islets from 3 mice);  $**p < 0.005$ ,  $***p < 10^{-10}$ . **(D)** Giantin protein level in control and KO islets.

# Supplemental Figure 1.

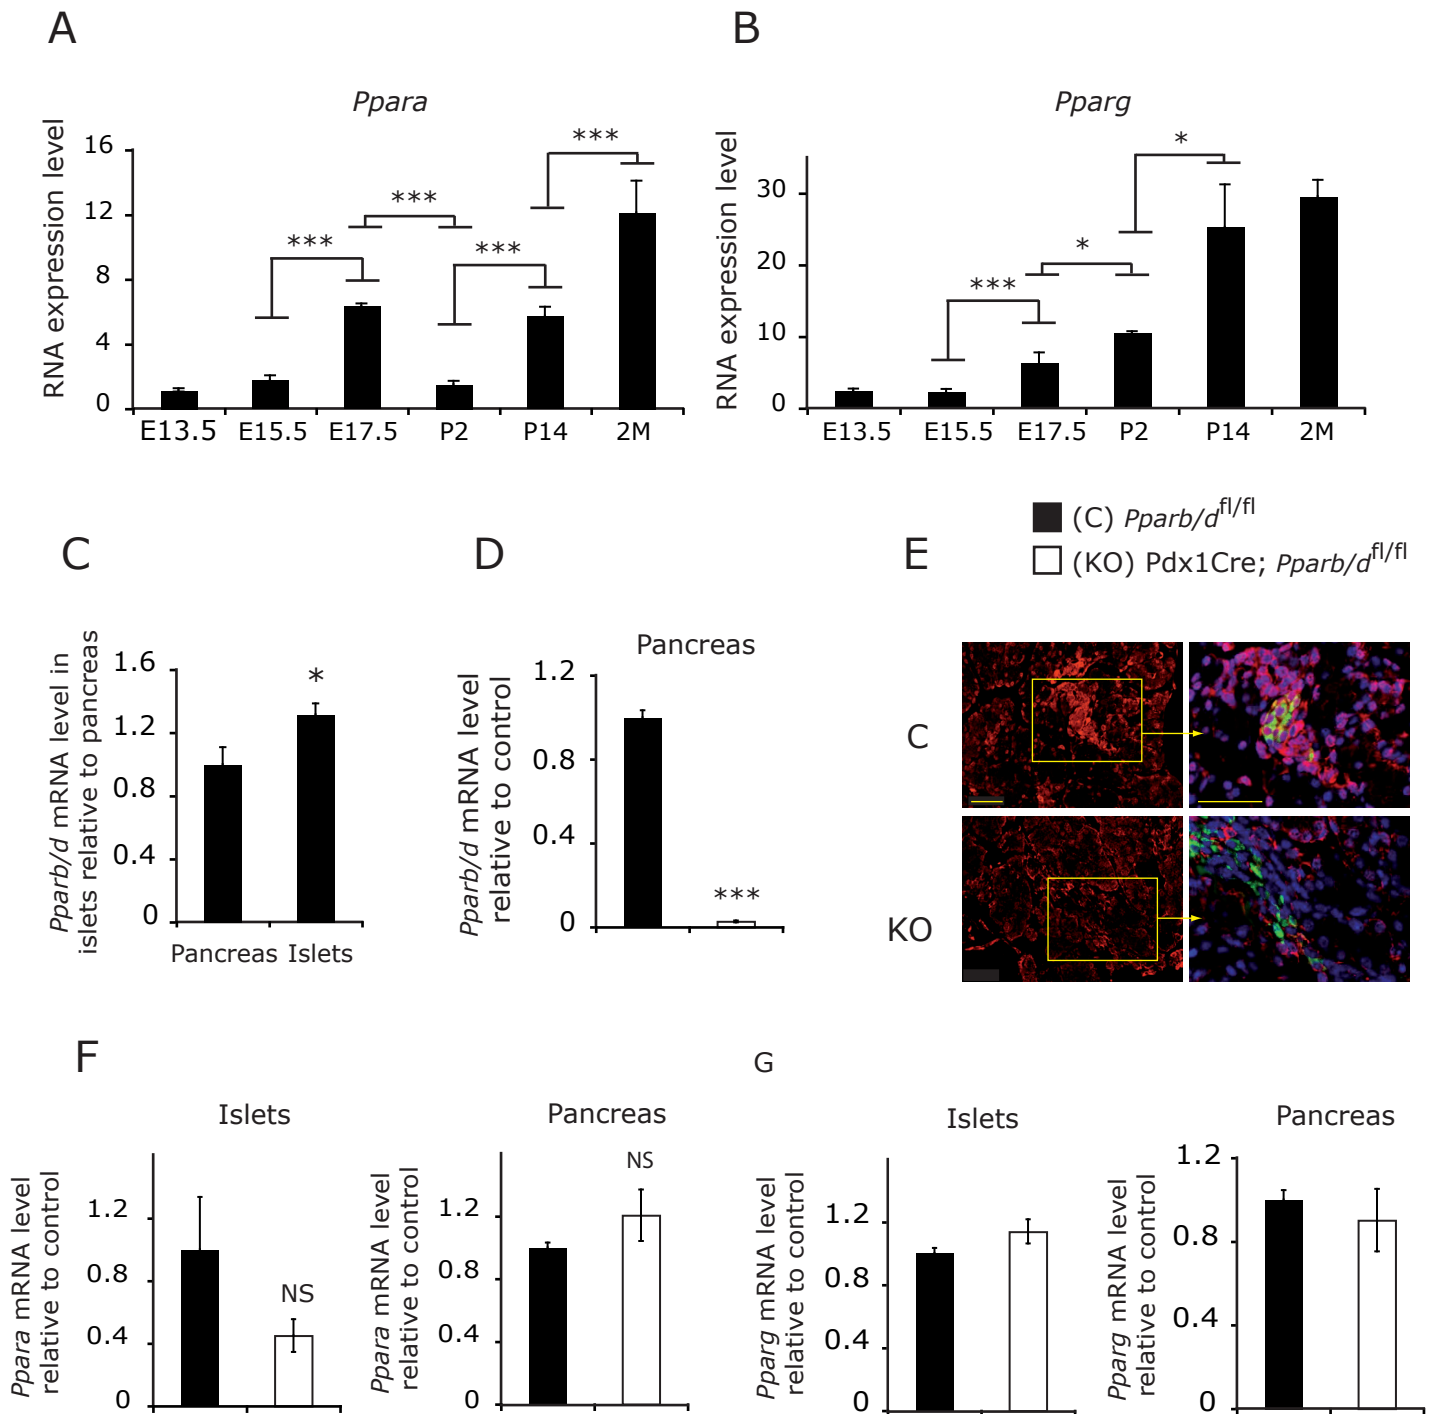

# Supplemental Figure 2.

(C) *Pparb*<sup>fl/fl</sup>  
 (KO) *Pdx1*Cre; *Pparb*<sup>fl/fl</sup>

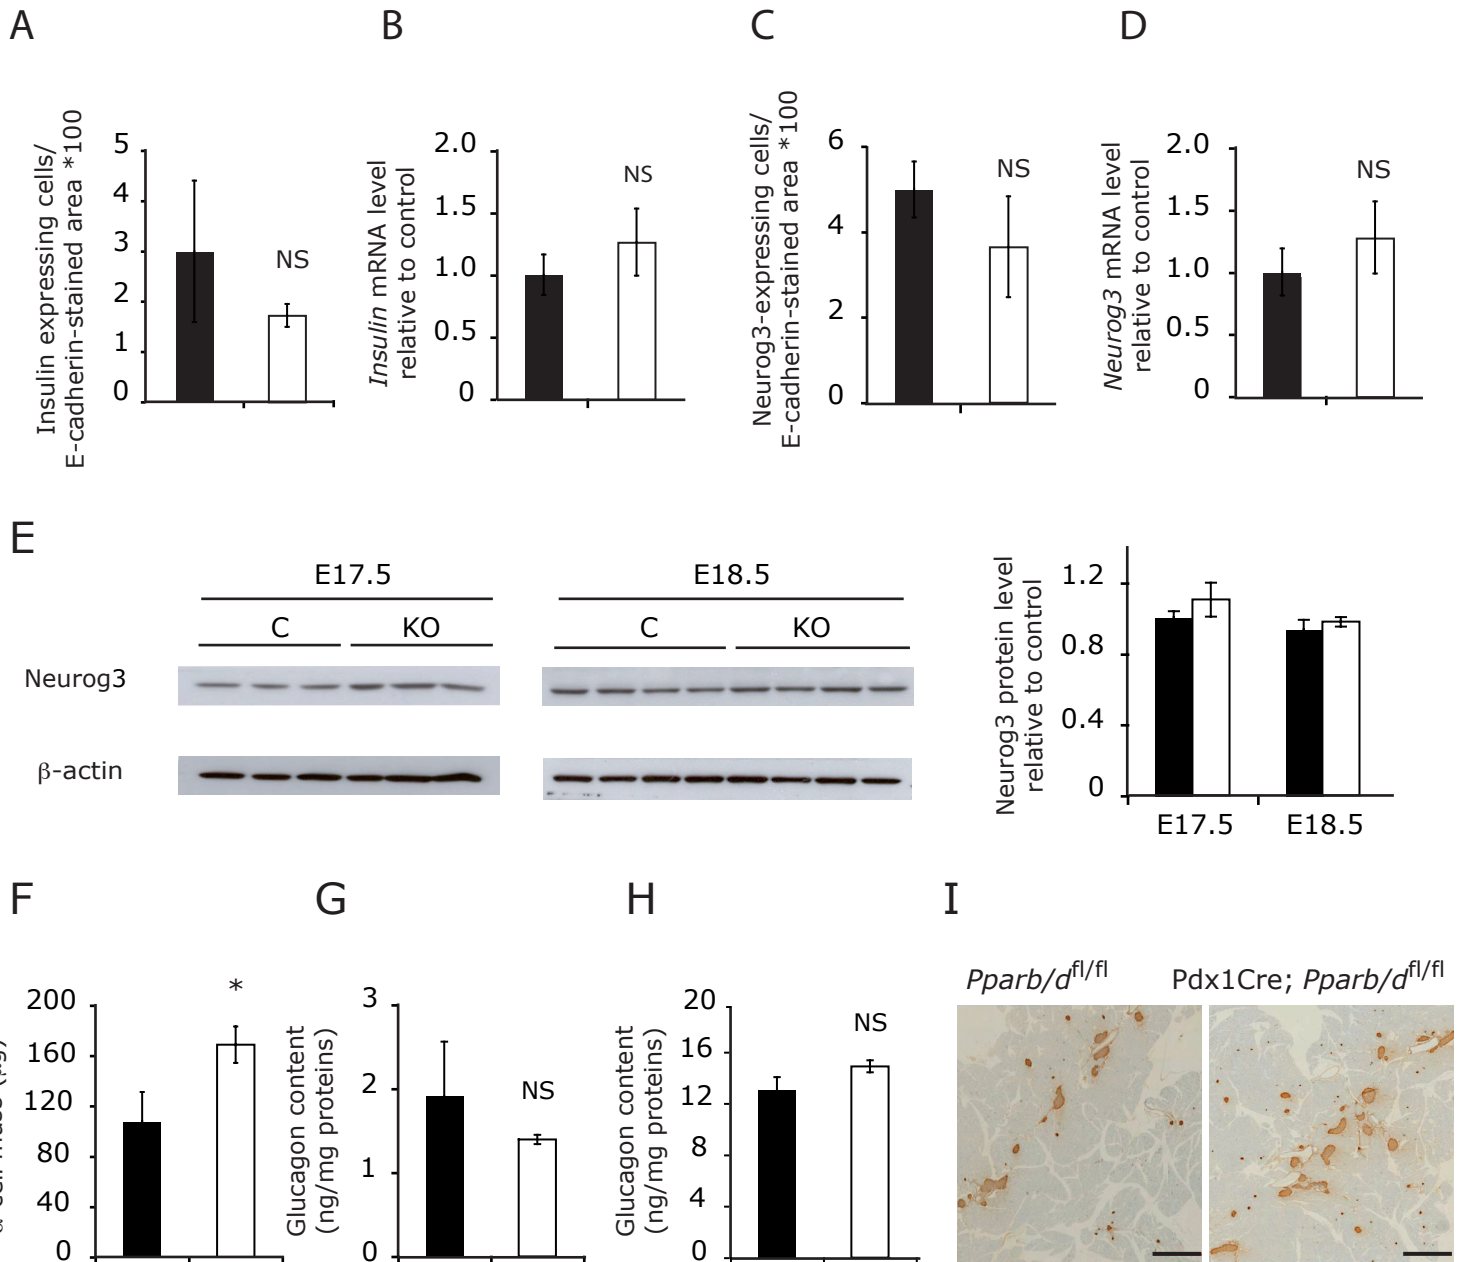

# Supplemental Figure 3.

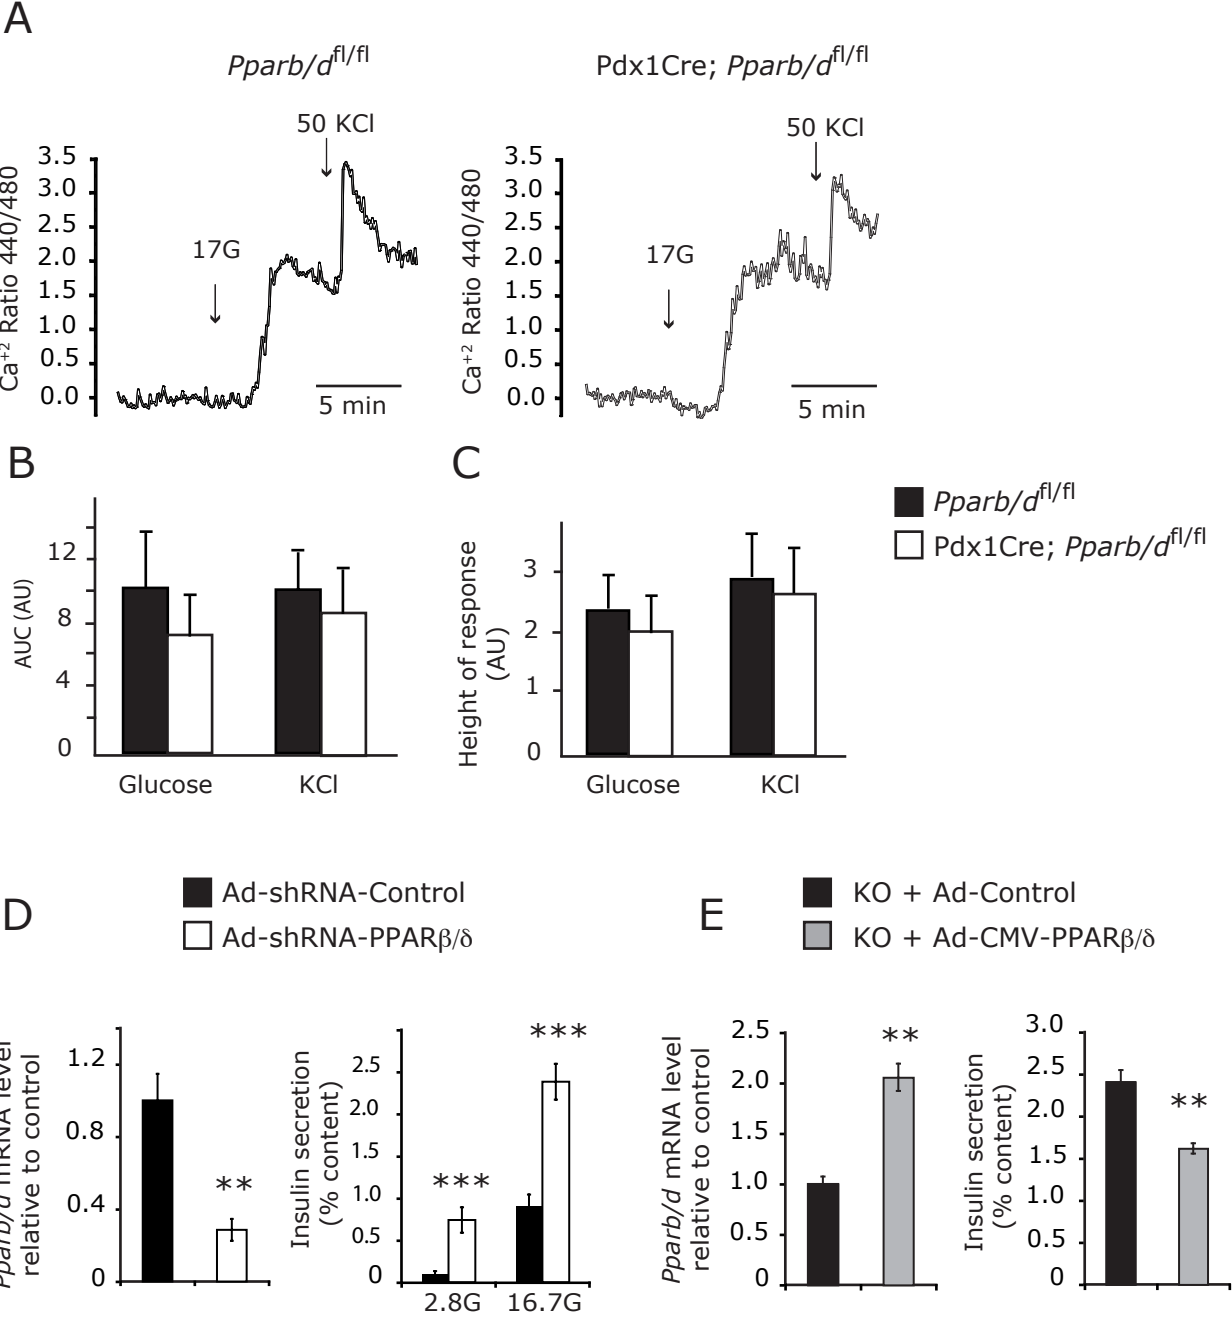

# Supplemental Figure 4.

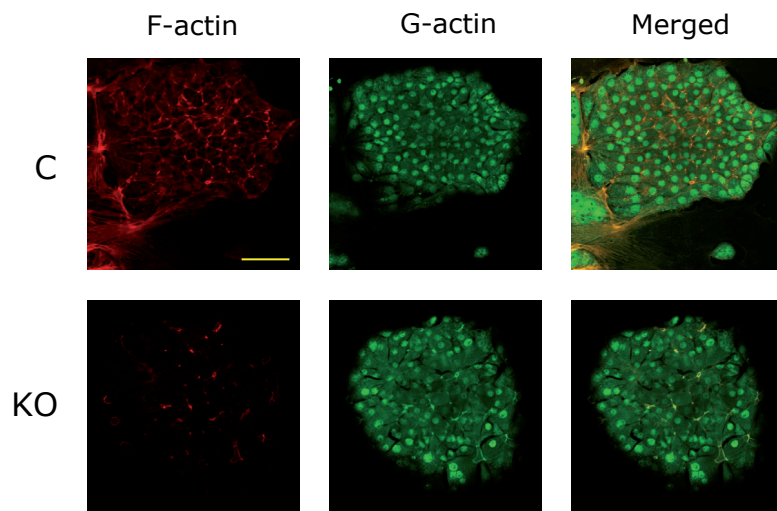

# Supplemental Figure 5.

■ (C) *Pparb/d<sup>fl/fl</sup>*  
□ (KO) *Pdx1Cre; Pparb/d<sup>fl/fl</sup>*

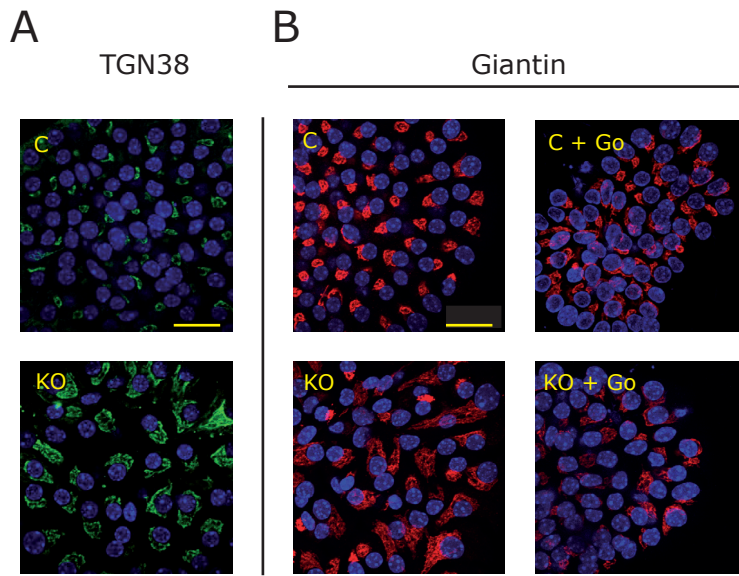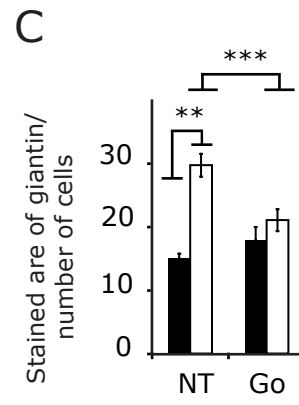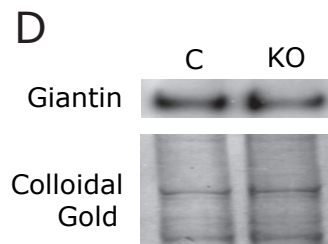



**Supplemental Table 1.** Fold change (FC) of PPARs, differentiated and precursors endocrine markers expression between PPAR $\beta/\delta$  deficient and control pancreas at postnatal stages

| Symbol              | P3          |            | P14         |            |
|---------------------|-------------|------------|-------------|------------|
|                     | FC          | t-test     | FC          | t-test     |
| PPAR $\alpha$       | -1.23049756 | NS         | -1.13340572 | 0.02514891 |
| PPAR $\beta/\delta$ | -6.08490975 | 4.7898E-09 | -9.40179906 | 8.5639E-11 |
| PPAR $\gamma$       | -0.52235041 | NS         | -0.37653764 | NS         |
| Glucagon            | -2.82786619 | NS         | 3.38990002  | 0.02109872 |
| InsI                | 2.47556877  | 0.00811159 | 8.89706459  | 5.7513E-07 |
| InsII               | -0.11440893 | NS         | 2.81375094  | 0.00041674 |
| Sst                 | 1.54547959  | NS         | 1.31322911  | NS         |
| Pdx1                | 0.65489487  | NS         | 4.80031991  | 2.9056E-07 |
| Neurog3             | -3.3234005  | 0.00330301 | -7.43768898 | 3.2577E-07 |
| NeuroD              | -3.08986113 | NS         | 6.37959569  | 0.00018235 |
| Nkx2-2              | 0.51585672  | NS         | 5.61593277  | 0.00430985 |
| Pax6                | -2.77234528 | NS         | 2.96381988  | 0.00061784 |
| Brn4                | -4.00223617 | NS         | -3.18858871 | 0.00140956 |
| Isl1                | -1.23095063 | NS         | 3.63326736  | 0.0004099  |
| P48                 | 1.14276677  | NS         | 0.43357942  | NS         |

Gene expression was determined from total pancreas RNA at postnatal day 3 (P3) and 14 (P14) by TaqMan. t-test we compared two groups and assumed a two-tailed distribution and unequal variance. n=5. NS = Non significant

Supplemental Table 2. GO enrichment term

| Cut-off | Direction | Term             | Obs | Exp | Pval       | Genes                                                                                                                                                                                                                                                                     |
|---------|-----------|------------------|-----|-----|------------|---------------------------------------------------------------------------------------------------------------------------------------------------------------------------------------------------------------------------------------------------------------------------|
| FDR 10% | UP        | adhesion         |     | 17  | 11.5207101 | 0.07257204 Tgm2, Cldn1, Cpxm2, Thyh1, Cldn2, Cml2, Cdh17, Itga6, Cldn8, B4galt1, Pcdh1, Amigo2, F8, Icam1, Tgfb, Igfals, Cntn3                                                                                                                                            |
| FDR 10% | UP        | apoptosis        |     | 17  | 13.8384332 | 0.2292618 Cradd, Nek6, Elmo1, Igrfp3, Ngfr, Hif1a, Asah2, Cln8, Tnfrsf11b, B4galt1, Il6, Acvr1c, Chpt1, Sgms1, Casp3, Tnfrsp8, Bcl2l1a                                                                                                                                    |
| FDR 10% | UP        | cell cycle       |     | 13  | 12.7899408 | 0.51581077 Tpd52l1, Nek6, Cdc14a, Zwint, Thyh1, Id4, Cks1b, Loh1lcr2a, Araf, Jun, Smarcb1, Casp3, Syce2                                                                                                                                                                   |
| FDR 10% | UP        | cell differentia |     | 16  | 14.8792899 | 0.41915301 Hoxp, Hrb, Xdh, Rasgrp1, Morc1, Ngfr, Tnfrfp2, Hif1a, Pappa, Efnb2, Il6, Acvr1c, Jun, Smarcb1, Semad4, Efnas                                                                                                                                                   |
| FDR 10% | UP        | cell junction    |     | 11  | 6.48284024 | 0.0625105 Cldn1, Panx1, Rph3a, Cldn2, Cldn8, Itsn1, Dig2, Scamp5, Synpr, Gad2, Syt10                                                                                                                                                                                      |
| FDR 10% | UP        | cytoskeleton     |     | 14  | 9.64615385 | 0.10648961 Pallid, Pstpip2, Sntg2, Elmo1, Epb4.114a, Mylk, Rph3a, Myo3a, Wipf1, Enc1, Cttbnp2, Svll, Dnm3, Tbccl                                                                                                                                                          |
| FDR 10% | UP        | development      |     | 40  | 33.1366864 | 0.12401304 Hoxp, Wnt5b, G6pd2, Prrxl1, Prr15, Runx1, Dkk3, Scn9a, Fzd3, Grh1, Hrb, Morc1, Ngfr, Id4, Cml2, Fzd4, Ppp2r2b, Tnfrfp2, Hif1a, Gfra3, Dct, Efnb2, Ugcg, Myo5a, Cln8, Slc39a6, Bptf, B4galt1, Slc5a3, Acvr1c, Smarcb1, Fgfr2, Casp3, Sftpd, Thbd, Enc1, Crybb3, |
| FDR 10% | UP        | endoplasmic r    |     | 28  | 15.3674556 | 0.00217466 Fmo1, Edem3, Ugt1a1, Acsf4, H13, Minpp1, P4he1, Rasgrp1, Tap2, Sqle, Cml2, Cldn8, Ugcg, Stch, Cln8, Slc39a6, Tmed5, Serinc5, Atf6, Sgms1, Soat1, Mcdf2, Txndc4, Apob, Trappc2, B3galt5, Edem1, Ero1l                                                           |
| FDR 10% | UP        | fatty acid       |     | 7   | 2.94852071 | 0.2906126 Acadb5, Acot12, Acsf4, Acsf2, Myo5a, Fabp4, Ehadh                                                                                                                                                                                                               |
| FDR 10% | UP        | Golgi            |     | 52  | 25.8523544 | 1.27E-06 Chst9, Chst9, Wip1, Wip1, St3gal3, St3gal3, Rasgrp1, Rasgrp1, Cml2, Cml2, Galnt7, Galnt7, Tmem90a, Tmem90a, Abca1, Abca1, Igf2r, Igf2r, Myo5a, Myo5a, Cln8, Cln8, Galnt14, Galnt14, Serinc5, Serinc5, Sppg3a, Sppg3a, B4galt1, B4galt1, Chpt1, Chpt1, Sgms1, Sg  |
| FDR 10% | UP        | immune respo     |     | 15  | 7.51775148 | 0.00913106 Cfb, P2ry14, Tap2, Cxcl3, H2-Q6, C3, Cxcl11, Il1rn, Il1rap, Mpa2l, Il6, 5830443L24RIK, Igh, Cxcl5, H2-Q7                                                                                                                                                       |
| FDR 10% | UP        | ion transport    |     | 22  | 12.6532544 | 0.00896141 Slc9a9, Cybb, Scn9a, Kcnk10, Thyh1, Trpm1, Slc40a1, Slc39a11, Kcna2, Atox1, Slc39a6, Cp, Kcnj5, Slc5a3, Tmem38a, Slc41a2, Hcn1, Slc31a1, Ctrf, Kcne4, Slc44a, Scnn1g                                                                                           |
| FDR 10% | UP        | lipid            |     | 22  | 10.0757396 | 0.00056656 Mtmr10, Acadb5, Acot12, Acsf4, Lipla, Acsf2, Acad11, Asah2, Ugcg, Abca1, Il1rn, Cln8, Osbp16, Serinc5, Pla2g7, Chpt1, Sgms1, Ehadh, Atp8a1, Soat1, Enpp2, Apob                                                                                                 |
| FDR 10% | UP        | mitochondrion    |     | 21  | 18.4136095 | 0.29869622 Acadb5, Cybb, Acsf4, Aass, Slc25a20, Endog, Ak3l1, Acsf2, Vps25, Rnasel, Asah2, Nudt9, Ivd, Slc5a3, Araf, Dbi, Ehadh, Car5b, Oat, Ctss, Dnm3                                                                                                                   |
| FDR 10% | UP        | oxidation        |     | 10  | 5.83846154 | 0.0699215 Fmo1, Ugdh, Acadb5, Cybb, Enox1, Xdh, Acad11, Ivd, Ehadh, Ero1l                                                                                                                                                                                                 |
| FDR 10% | UP        | protein transp   |     | 10  | 10.9934911 | 0.66373355 Syt13, Rph3a, Tap2, Vps25, Apobec1, Rab3c, Scamp5, Mcdf2, Apob, Nup93                                                                                                                                                                                          |
| FDR 10% | UP        | proteolysis      |     | 18  | 10.4662722 | 0.01883408 Cradd, Ctss, Tgm2, Cfb, Cpxm2, St14, Pappa, Lonrf3, Cpd, Gpr26, Gm13, Casp3, Igh, Eps8, Plau, Lgmn, Eps8, Ctss                                                                                                                                                 |
| FDR 10% | UP        | signal transdu   |     | 47  | 28.6260355 | 0.00057239 Cradd, Wnt5b, Adora2b, Chn1, Ptger4, Elmo1, Cblc, Gnal, P2ry14, Rasal2, Fzd3, Fga, Gm266, Cish, Rasgrp1, Sdcfbp, Ngfr, Rgs1, Fzd4, Ppp2r2b, Rhp2, Ms44c, Socs2, Pde7b, Hif1a, Gem, Rerg, Il1rn, Fgl2, Il1rap, Gpr26, Rab3c, Tnfrsf11b, Atf6, Its               |
| FDR 10% | UP        | signaling        |     | 44  | 32.0627219 | 0.02040958 Dapp1, Tgm2, Car8, Wnt5b, Entpd2, Pdzd8, Adora2b, Chn1, Ptger4, Dkk3, Csf2rb, AW551984, Lmbr1, Gnal, P2ry14, Tbc1d4, Fzd3, Gpr116, Cish, Rasgrp1, Ngfr, Rgs1, Plk3c3, Fzd4, Rhp2, Socs2, Hif1a, Itga6, Gfra3, Il1rap, Gpr26, Penk1, Itsn1, Gpr135, Adm2, Araf, |
| FDR 10% | UP        | small GTPase     |     | 8   | 5.03786982 | 0.134005571 Rasal2, Gm266, Rasgrp1, Gem, Rerg, Rab3c, Itsn1, Rap2b                                                                                                                                                                                                        |
| FDR 10% | UP        | synapse          |     | 7   | 4.43254438 | 0.1574244 Rph3a, Itsn1, Dig2, Scamp5, Synpr, Gad2, Syt10                                                                                                                                                                                                                  |
| FDR 10% | UP        | transcription    |     | 33  | 45.3408284 | 0.98258265 Hoxp, Xbp1, Prrxl1, Ncoar7, Hif1, Runx1, Ankrd56, Grhl1, Flil1, Thyh1, Id4, Hsbp1, Vgl14, Vps25, Hif1a, Ikzf4, Fabp4, Mfz2, Bptf, Phtf2, Atf6, Il6, Jun, Smarcb1, Trm24, Myo3a, Sox11, Pde8b, Spic, Rps6ka5, Zfp697, Trappc2, Tie4                             |
| FDR 10% | UP        | vesicle          |     | 12  | 6.50236686 | 0.0314058 Wip1l, Hrb, Slc40a1, Rph3a, Igf2r, Rab3c, Scamp5, Synpr, Gad2, Syt10, Atp8a1                                                                                                                                                                                    |
| FDR 10% | DOWN      | adhesion         |     | 10  | 5.77378243 | 0.06559745 Mybph, Cntnap2, Reln, Cd24a, L1cam, Cadm1, Jup, Cxadr, Cntn1, Hnt                                                                                                                                                                                              |
| FDR 10% | DOWN      | cell cycle       |     | 9   | 6.40987711 | 0.19407487 Cna2, Dab2ip, S100a6, Cks2, Cadm1, Setd8, Lin9, Cdca8, Chfr                                                                                                                                                                                                    |
| FDR 10% | DOWN      | cell differentia |     | 14  | 7.4569868  | 0.01820017 Reln, Cd24a, Stmn1, Anpep, L1cam, Bcl11a, Utp14b, Il11ra1, Cadm1, Rorc, Dap1l, Pappa2, Hhex, Clu                                                                                                                                                               |
| FDR 10% | DOWN      | cell division    |     | 5   | 2.40737369 | 0.09467112 Cna2, Cks2, Setd8, Cdca8, Chfr                                                                                                                                                                                                                                 |
| FDR 10% | DOWN      | cytoskeleton     |     | 13  | 4.83413953 | 0.00122056 Lyst, Myo15b, Plek2, Ptn13, Trib2, Fhd33, Jup, Miph, Thl10, Myo5b, Cntl1, Epb4.12, Kalrn                                                                                                                                                                       |
| FDR 10% | DOWN      | development      |     | 23  | 16.606964  | 0.07004957 Etv1, Ctrf, Reln, Cd24a, Dok7, Stmn1, Anpep, Th, Siv4, L1cam, Shisa2, Utp14b, Il11ra1, Cadm1, Plxna1, Rorc, Pcsk9, Car10, Cxadr, Nes, Crl1, Hhex, Clu                                                                                                          |
| FDR 10% | DOWN      | endoplasmic r    |     | 9   | 7.7016386  | 0.36487206 Adora1, Emid1, Shisa2, Utp14b, Pcsk9, Degs2, Iptr3, Rcn1                                                                                                                                                                                                       |
| FDR 10% | DOWN      | immune respo     |     | 7   | 3.76763769 | 0.08507136 Cd24a, Cd27, Cadm1, Il1r1, Crl1, Ccl27, Cxcl16                                                                                                                                                                                                                 |
| FDR 10% | DOWN      | ion transport    |     | 11  | 6.3413746  | 0.05468407 Adora1, Slc30a8, Kcnk16, Kcnh1, Slc10a6, Slc47a, Kcnj6, Fxyd3, Iptr3, Slc22a23, Gria2                                                                                                                                                                          |
| FDR 10% | DOWN      | lipid            |     | 6   | 5.04961311 | 0.39286149 Adora1, Utp14b, Acot2, Pcsk9, Degs2, Acaa2                                                                                                                                                                                                                     |
| FDR 10% | DOWN      | mitochondrion    |     | 9   | 9.22826582 | 0.57824753 Atp1f1, Glul, Utp14b, Acot2, Gpd2, Pth2, Acaa2, Aldh2, Tat                                                                                                                                                                                                     |
| FDR 10% | DOWN      | protein transp   |     | 6   | 5.50955849 | 0.47426247 Lyst, Selenbp1, Rab37, Miph, Rab27b, Xpo7                                                                                                                                                                                                                      |
| FDR 10% | DOWN      | proteolysis      |     | 6   | 5.24533455 | 0.4277178 Fap, Anpep, Mela, Pcsk9, Pappa2, 49314330A1RIK                                                                                                                                                                                                                  |
| FDR 10% | DOWN      | signal transdu   |     | 22  | 14.3463814 | 0.03035281 Adora1, Lyst, Cntnap2, Reln, Gpr19, Cd24a, Arhgef2, Kcnh1, Dab2ip, Gab1, L1cam, Vipr1, Braf, Npas3, Plxna1, Rab37, Eps8l2, Il1r1, Rab27b, Rgs11, Kalrn, Ghsr                                                                                                   |
| FDR 10% | DOWN      | signaling        |     | 21  | 16.0687301 | 0.12586368 Adora1, Ptprg, Gpr19, Cd24a, Stmn1, Plek2, Arhgef2, L1cam, Vipr1, Braf, Insr, Med13, Ptprt, Il11ra1, Spsb4, Il1r1, Adcy7, Rgs11, Cntn1, Hhex, Ghsr                                                                                                             |
| FDR 10% | DOWN      | transcription    |     | 24  | 22.723259  | 0.4203575 Fev, Irx2 Etv1, Tox, Tardbp, Chd5, Ccna2, Tanc2, Mxipl, Six4, Kcnh1, Bcl11a, Braf, Med13, Npas3, Hdac6, Rorc, Rab37, Setd8, Ercc8, Tpbp, Ing2, Tox3, Hhex                                                                                                       |
| FDR 10% | DOWN      | ubiquitin        |     | 6   | 5.2257624  | 0.42424131 Stub1, Usp29, Ube2v2, Hdac6, Spsb4, Chfr                                                                                                                                                                                                                       |
| FDR 5%  | UP        | adhesion         |     | 12  | 5.88120164 | 0.0156653 Cldn1, B4galt1, Cpxm2, Pcdh1, Amigo2, Icam1, Cldn2, Cdh17, Igfals, Cntn3, Itga6, Cldn8                                                                                                                                                                          |
| FDR 5%  | UP        | apoptosis        |     | 9   | 7.08734638 | 0.27972167 Cradd, Tnfrsf11b, B4galt1, Il6, Acvr1c, Chpt1, Elmo1, Tnfrsp8, Ngfr                                                                                                                                                                                            |
| FDR 5%  | UP        | cell cycle       |     | 4   | 6.52913063 | 0.89490189 Tpd52l1, Araf, Smarcb1, Id4                                                                                                                                                                                                                                    |
| FDR 5%  | UP        | cell differentia |     | 8   | 7.59572144 | 0.49128026 Hoxp, Il6, Acvr1c, Smarcb1, Xdh, Rasgrp1, Ngfr, Efnas                                                                                                                                                                                                          |
| FDR 5%  | UP        | cell junction    |     | 9   | 3.30942194 | 0.00628947 Cldn1, Dig2, Panx1, Gad2, Synpr, Syt10, Rph3a, Cldn2, Cldn8                                                                                                                                                                                                    |
| FDR 5%  | UP        | cytoskeleton     |     | 9   | 4.92426036 | 0.06013805 Pallid, Pstpip2, Sntg2, Elmo1, Myo3a, Epb4.114a, Rph3a, Cttbnp2, Svll                                                                                                                                                                                          |
| FDR 5%  | UP        | development      |     | 16  | 16.9159308 | 0.62887424 Hoxp, G6pd2, Runx1, B4galt1, Acvr1c, Scn9a, Smarcb1, Grhl1, Sftpd, Id4, Ngfr, Crybb3, Ppp2r2b, Apob, Gfra3, Efnas                                                                                                                                              |
| FDR 5%  | UP        | endoplasmic r    |     | 15  | 7.8449249  | 0.0127237 Fmo1, Edem3, Ugt1a1, Serinc5, Atf6, Minpp1, Rasgrp1, Soat1, Mcdf2, Apob, Trappc2, B3galt5, Ero1l, Cldn8                                                                                                                                                         |
| FDR 5%  | UP        | fatty acid       |     | 1   | 1.50518889 | 0.78080401 Ehadh                                                                                                                                                                                                                                                          |
| FDR 5%  | UP        | Golgi            |     | 26  | 13.1978152 | 0.00074747 Serinc5, Serinc5, B4galt1, B4galt1, Chst9, Chst9, Chpt1, Chpt1, B3galt1, B3galt1, Wip1, Wip1, Gad2, Gad2, St3gal5, St3gal5, Rasgrp1, Rasgrp1, B3galt1, B3galt1, Mcdf2, Mcdf2, Trappc2, Trappc2, B3galt5, B3galt5                                               |
| FDR 5%  | UP        | immune respo     |     | 10  | 3.83773327 | 0.00545872 Cxcl11, Il1rap, Mpa2l, Il6, Mpa2l, P2ry14, 5830443L24RIK, Igh, Cxcl5, C3                                                                                                                                                                                       |
| FDR 5%  | UP        | ion transport    |     | 14  | 6.45935366 | 0.00568632 Slc9a9, Slc39a11, Kcna2, Cp, Kcnj5, Tmem38a, Scn9a, Slc41a2, Hcn1, Slc31a1, Ctrf, Trpm1, Kcne4, Scnn1g                                                                                                                                                         |
| FDR 5%  | UP        | lipid            |     | 9   | 5.1435594  | 0.07445451 Mtmr10, Osbp16, Serinc5, Chpt1, Ehadh, Atp8a1, Soat1, Enpp2, Apob                                                                                                                                                                                              |
| FDR 5%  | UP        | mitochondrion    |     | 7   | 9.39995448 | 0.83447788 Ivd, Araf, Ak3l1, Ehadh, Car5b, Oat, Ctss                                                                                                                                                                                                                      |
| FDR 5%  | UP        | oxidation        |     | 6   | 2.98047337 | 0.07957658 Fmo1, Ivd, Enox1, Ehadh, Xdh, Ero1l                                                                                                                                                                                                                            |
| FDR 5%  | UP        | protein transp   |     | 6   | 5.6120619  | 0.49203526 Syt13, Rph3a, Mcdf2, Apob, Nup93, Apobec1                                                                                                                                                                                                                      |
| FDR 5%  | UP        | proteolysis      |     | 7   | 5.3429217  | 0.28767464 Cradd, Lonrf3, Gpr26, Cpxm2, Igh, Lgmn, Ctss                                                                                                                                                                                                                   |
| FDR 5%  | UP        | signal transdu   |     | 28  | 14.6132909 | 0.00071478 Cradd, Rerg, Fgl2, Il1rap, Gpr26, Adora2b, Ptger4, Tnfrsf11b, Atf6, Clecl1b, Gpr135, Elmo1, Araf, Cblc, Il13ra1, Rap2b, Gpr126, P2ry14, Rasal2, Ms44c6, Cish, Cxcl5, Pde8b, Rasgrp1, Ngfr, Ppp2r2b, Socs2, Pde7b                                               |
| FDR 5%  | UP        | signaling        |     | 26  | 16.3676832 | 0.01292881 Dapp1, Car8, Il1rap, Entpd2, Gpr26, Pdzd8, Adora2b, Ptger4, Penk1, Gpr135, Adm2, Araf, Gpr126, P2ry14, Mtap7d2, Ahnak, Tbc1d4, Csf2rb, Cish, Rasgrp1, Ngfr, Prkd1, Socs2, Itga6, Tie4, Gfra3                                                                   |
| FDR 5%  | UP        | small GTPase     |     | 4   | 2.5717797  | 0.25683702 Rerg, Rap2b, Rasal2, Rasgrp1                                                                                                                                                                                                                                   |
| FDR 5%  | UP        | synapse          |     | 5   | 2.26276741 | 0.07744062 Dig2, Gad2, Synpr, Syt10, Rph3a                                                                                                                                                                                                                                |
| FDR 5%  | UP        | transcription    |     | 18  | 23.1460173 | 0.89734076 Hoxp, Ncoar7, Phtf2, Hif1, Runx1, Atf6, Il6, Smarcb1, Grhl1, Myo3a, Sox11, Id4, Pde8b, Spic, Rps6ka5, Zfp697, Trappc2, Tie4                                                                                                                                    |
| FDR 5%  | UP        | vesicle          |     | 6   | 3.31939008 | 0.11687146 Wip1l, Gad2, Synpr, Syt10, Atp8a1, Rph3a                                                                                                                                                                                                                       |
| FDR 5%  | DOWN      | adhesion         |     | 4   | 1.63814292 | 0.08122878 Cadm1, Cntn1, Jup, Reln                                                                                                                                                                                                                                        |
| FDR 5%  | DOWN      | cell cycle       |     | 1   | 1.8186163  | 0.84258056 Cadm1                                                                                                                                                                                                                                                          |
| FDR 5%  | DOWN      | cell differentia |     | 8   | 2.11570323 | 0.00117104 Il11ra1, Cadm1, Pappa2, Rorc, Dap1l, Reln, Utp14b, Anpep                                                                                                                                                                                                       |
| FDR 5%  | DOWN      | cytoskeleton     |     | 3   | 1.37159763 | 0.15773544 Ptpn13, Jup, Miph                                                                                                                                                                                                                                              |
| FDR 5%  | DOWN      | development      |     | 10  | 4.71174329 | 0.01773934 Il11ra1, Cadm1, Rorc, Etv1, Six4, Pcsk9, Reln, Dok7, Utp14b, Anpep                                                                                                                                                                                             |
| FDR 5%  | DOWN      | endoplasmic r    |     | 6   | 2.18511607 | 0.02167707 Adora1, Rcn1, Pcsk9, Emid1, Utp14b, Iptr3                                                                                                                                                                                                                      |
| FDR 5%  | DOWN      | immune respo     |     | 3   | 1.06895767 | 0.09152767 Cadm1, Ccl27, Ccl27                                                                                                                                                                                                                                            |
| FDR 5%  | DOWN      | ion transport    |     | 7   | 1.7991807  | 0.002062 Adora1, Kcnh1, Gria2, Fxyd3, Slc30a8, Kcnj6, Iptr3                                                                                                                                                                                                               |
| FDR 5%  | DOWN      | lipid            |     | 3   | 1.43268093 | 0.17257546 Adora1, Pcsk9, Utp14b                                                                                                                                                                                                                                          |
| FDR 5%  | DOWN      | mitochondrion    |     | 2   | 2.61825216 | 0.74329438 Tat, Utp14b                                                                                                                                                                                                                                                    |
| FDR 5%  | DOWN      | protein transp   |     | 3   | 1.56317706 | 0.20552603 Selenbp1, Miph, Xpo7                                                                                                                                                                                                                                           |
| FDR 5%  | DOWN      | proteolysis      |     | 9   | 1.4882112  | 0.18640546 Pappa2, Pcsk9, Anpep                                                                                                                                                                                                                                           |
| FDR 5%  | DOWN      | signal transdu   |     | 7   | 4.07036869 | 0.11056519 Adora1, Npas3, Kcnh1, Eps8l2, Reln, Gpr19, Ghsr                                                                                                                                                                                                                |
| FDR 5%  | DOWN      | signaling        |     | 5   | 4.55903505 | 0.48327762 Adora1, Il11ra1, Cntn1, Gpr19, Ghsr                                                                                                                                                                                                                            |
| FDR 5%  | DOWN      | transcription    |     | 8   | 6.44706418 | 0.31459057 Npas3, Mxipl, Rorc, Etv1, Six4, Kcnh1, Tox, Tpbp                                                                                                                                                                                                               |

## **Supplementary Methods**

### ***X-gal staining and immunohistochemistry in pancreas and islets***

Embryo (E15.5) and adult (8 weeks of age) pancreata and ECM-plated islets were washed with PBS and fixed immediately in 4% paraformaldehyde at 4°C overnight or 10 min for ECM plated islets. For X-GAL staining, we fixed 10 min after dissection, and then we submerged the tissue for 4 h in X-gal solution (40 mg X-GAL/ml DMSO, diluted 1:40 in 5 mM  $K_3Fe(CN)_6$ , 5 mM  $K_4Fe(CN)_6$ , 2 mM  $MgCl_2$  in PBS). Finally, we fixed the tissue overnight in 4% paraformaldehyde. For immunostaining, we embedded the tissue in paraffin and cut sections 5  $\mu$ m thick. Then, sections were hydrated and boiled for 15 min in 0.01 mol/l sodium citrate pH 6, and the endogenous peroxidase activity was inhibited with 3%  $H_2O_2$  for 30 min, only for colorimetric detection. Next, sections were permeabilized with TBS 0.05% Tween 20. Blocking was performed with milk or 10% normal goat serum for 1 h; finally, the primary and secondary antibodies were incubated overnight and 1 h, respectively. In the colorimetric method, sections were incubated with biotinylated secondary antibody, and detection was performed with the Vectastain ABC kit (Vector Laboratories, Burlingame, CA), followed by incubation with diaminobenzidine (DAB) peroxidase substrate (Sigma).

### ***Morphometric quantification of islets and cell numbers***

E15.5 pancreata from 3  $Pdx1Cre;Pparb/d^{fl/fl}$  and 3  $Pparb/d^{fl/fl}$  embryos were cut in 2–4 sections of 5  $\mu$ m thickness every 75  $\mu$ m. The Neurog3- or insulin-positive cells were counted from all the sections by using a standard fluorescence microscope at 10X (Neurog3) or 20X (insulin) magnification. The cell number was normalized by epithelial e-cadherin expressing area, and determined using ImageJ software. Pancreata from 3  $Pdx1Cre;Pparb/d^{fl/fl}$  and 3  $Pparb/d^{fl/fl}$  8-week-old mice were processed to determine the islet  $\beta$ -cell mass. 18 (6 per mouse) insulin-stained (colorimetric method) sections of 5  $\mu$ m thickness separated by 150  $\mu$ m

were scanned by a digital Coolscope microscope (Nikon Corporation) at 10X magnification. Then, we calculated the area of islets (more than 5 cells) from whole sections, using ImageJ software. The total islet area was divided by the total pancreas area to obtain the relative insulin cell surface, which was multiplied by the weight of the pancreas to get the  $\beta$ -cell mass. To determine the  $\alpha$ -cell mass we processed glucagon-stained sections as above.

### ***Capacitance measurements***

Measurements of exocytosis were performed in the whole-cell configuration using an EPC-9 amplifier controlled by Pulse software (both HEKA Elektronik, Germany). The intracellular solution consisted of (in mM) 125 CsCl, 10 NaCl, 1 MgCl<sub>2</sub>, 3 ATP-Mg, 0.1 cAMP, 0.05 EGTA, and 5 HEPES (pH 7.15). The extracellular solution was (in mM) 138 NaCl, 5.6 KCl, 1.2 MgCl<sub>2</sub>, 2.6 CaCl<sub>2</sub>, 3 D-glucose, and 10 mM HEPES (pH 7.40) and held at 32°C. Capacitance was measured using 500 Hz, 20-mV sine waves around -70 mV and calculated offline.  $\beta$ -Cells were identified through their electrophysiological properties (2).

### ***Intracellular Ca<sup>2+</sup> imaging***

Islets were dispersed using Ca<sup>++</sup> free buffer, then cultured for 48 h. Dispersed islets were incubated for 30 min in KRBH containing 3 mM glucose and 200 nM FURA-RED AM (Invitrogen, UK). Cells were stimulated using the conditions indicated and excited at 480/440 nm using an Olympus IX-81 microscope coupled to an F-view camera and captured using Cell R software (Olympus, UK) and a 40X oil immersion objective. Data are expressed as the ratio of the fluorescence emission at 440/480 nm. The area under the curve (AUC) and height of the response were calculated using OriginPro7.5 software (OriginLab, Northampton, MA), and statistical analysis was performed with t-tests using GraphPad Prism 4.0 (GraphPad Software Inc.).

### ***Microarray and TaqMan qRT-PCR***

Total RNA from islets or pancreas was extracted by using guanidine thiocyanate (Sigma) according to the manufacturer's recommendation. RNA quality and quantity was assessed by NanoDrop®ND-1000 spectrophotometer and an Agilent 2100 bio-analyzer. For the analysis of gene expression by TaqMan, we generated the cDNA from 200 ng of total RNA by using Super-Script III RT (Invitrogen, UK). PCR amplification was performed by using mouse-specific TaqMan probes (Applied Biosystems) on an Applied Biosystems 7900 HT SDS qRT-PCR system. Three biological samples were run in triplicate to assess the technical variability. For each sample of microarray analysis, 5 ng of total islet RNA was amplified and labeled using the GeneChip IVT labeling kit according to the protocol provided by the supplier. Affymetrix (Santa Clara, CA, USA) Mouse Genome 430 2.0 arrays were hybridized with 10 µg of labeled cRNA, washed, stained, and scanned according to the protocol described in the Affymetrix GeneChip® Expression Analysis Manual (Fluidics protocol EukGeWS2v5\_450). All the statistical analyses were performed using the free high-level interpreted statistical language R (<http://www.R-project.org>) and various Bioconductor packages (<http://www.Bioconductor.org>). Normalized expression signals were calculated from Affymetrix CEL files using the RMA normalization method implemented in the “affy” package (3,4). Differential hybridized features were identified using the Bioconductor package “limma” that implements linear models for microarray data (5). *P* values were then adjusted for multiple testing with Benjamini and Hochberg's method to control FDR.

The procedure to test for enrichment of GO annotation terms was performed separately on up- and downregulated genes as follows. First, the number of occurrences of the different Biological Process and Cellular Component GO categories was counted in the lists of regulated genes at FDR 5% and FDR 10% after removing duplicated genes. Single words like

“lipid” or composite terms like “immune response” were selected among the GO terms found in the top 5% of the occurrence lists. The goal of this procedure was to extract informative terms that would represent general aspects of the cellular physiology and give insight into the functions affected by the KO. We selected a list of 24 terms or words for the upregulated genes and a list of 17 terms or words for the downregulated genes. These selected terms were tested for enrichment in regulated genes using a Fisher’s exact test. To construct contingency tables, duplicated genes were removed. Then, we counted the number of genes on the array having a particular term in its GO annotations, as well as the number of regulated genes having a particular term in its GO annotations. Because only a few terms were tested, p values were not adjusted for multiple testing. Table S2 contains all the words tested for enrichment in the GO annotation. GO annotations contained on the Affymetrix annotation na26 were used.

## **Supplemental Tables**

### **Supplemental Table 2.** GO enrichment term

## **Supplemental References**

1. Cramer LP, Briggs LJ, Dawe HR. Use of fluorescently labelled deoxyribonuclease I to spatially measure G-actin levels in migrating and non-migrating cells. *Cell Motil Cytoskeleton*. 2002;51(1):27-38.
2. Barg S, Galvanovskis, J., Göpel, SO., Rorsman, P., Eliasson, L. Tight coupling between electrical activity and exocytosis in mouse glucagon-secreting alpha-cells. *Diabetes*. 2000;49(9):1500-1510.

3. Bolstad B, Irizarry, RA., Astrand, M., Speed, TP. A comparison of normalization methods for high density oligonucleotide array data based on variance and bias. *Bioinformatics*. 2003;19(2):185-193.
4. Irizarry R, Hobbs, B., Collin, F., Beazer-Barclay, YD., Antonellis, KJ., Scherf, U., Speed, TP. Exploration, normalization, and summaries of high density oligonucleotide array probe level data. *Biostatistics*. 2003;4(2):249-264.
5. Smyth G. Linear models and empirical bayes methods for assessing differential expression in microarray experiments. *Stat Appl Genet Mol Biol*. 2004;3:Article3.
